# Supplementary material for: Adaptability of the Saccharomyces cerevisiae yeasts to wine fermentation conditions relies on their strong ability to consume nitrogen
Source: PLoS One. 2018 Feb 12;13(2):e0192383. doi: 10.1371/journal.pone.0192383 (PMC5809068; doi:10.1371/journal.pone.0192383)
Supplement: S1 Table — (XLSX) [file pone.0192383.s001.xlsx]

## Sheet: CO2
Table S1. CO2 lost (g/L) during the fermentations processes using the NA, WA, SA, FWI and WE strains
	NA			WA			SA			FWI			WE
Time (h)	CO2 - 1	CO2 - 2	CO2 - 3	CO2 - 1	CO2 - 2	CO2 - 3	CO2 - 1	CO2 - 2	CO2 - 3	CO2 - 1	CO2 - 2	CO2 - 3	CO2 - 1	CO2 - 2	CO2 - 3
0	0	0	0	0	0	0	0	0	0	0	0	0	0	0	0
21	0.3225	0.34625	0.3336	0.0925	0.19625	0.9554	0.32	0.3375	0.29858	0.905	1.12625	0.94651	0.165	0.19625	0.168
25	0.82625	0.80875	0.881963	0.125	0.19875	0.1525	0.77625	0.83125	0.70148	2.1925	2.48	2.154	0.28125	0.3175	0.3158
28	1.50375	1.49625	1.49057	0.14375	0.23	0.17225	1.34375	1.505	1.05484	3.75625	4.1375	4.0165	0.49625	0.5425	0.51658
47	10.7638	10.6237	10.6856	0.48125	0.56625	0.47881	9.49	9.80625	9.7858	17.5587	19.2325	18.654	8.37375	6.26375	6.356
72	26.03	26.1013	26.0142	4.26	4.375	4.2565	24.3287	24.8438	24.7325	41.7025	45.9088	44.6541	23.3464	22.6287	22.0365
98	39.9788	41.4763	39.5488	15.43	16.825	15.9636	38.8575	39.1913	38.6951	63.4237	68.37	65.2654	42.1545	42.6588	42.0355
115	49.0925	50.47	50.6252	24.4288	26.1813	25.6115	48	48.2962	48.0125	74.1925	78.3438	75.654	56.145	55.96	55.9845
164	68.1312	70.4725	70.1114	47.0063	48.56	47.8958	68.1825	67.9075	67.5633	86.1262	87.4475	87.1652	78.1354	79.4488	79.1654
214	79.9975	81.4675	81.0023	65.6038	67.4	67.0215	80.585	78.335	78.9547	87.6237	88.615	87.6213	85.634	86.545	85.1658
262	84.53	84.8088	85.0098	78.6138	80.3663	78.9666	85.635	81.7412	84.2511	88.1175	89.0875	88.263	85.646	87.1075	85.264
345	86.42	86.175	86.5177	86.7988	87.5563	86.8958	87.5113	87.2516	88.5165	88.9088	89.8263	89.6123	87.2654	87.9813	86.1678
399	86.83	86.5887	86.6617	87.565	88.1875	87.1021	87.9525	85.465	87.5644	89.1825	90.1013	89.6136	88.1656	88.2987	87.199
442	87.1863	86.9425	87.1021	88.0013	88.6613	88.0558	88.3338	86.8187	87.2156	89.4237	90.3225	89.6155	88.1265	88.5712	87.6326
501	87.5662	87.295	87.2213	88.4538	89.155	88.2358	88.7088	86.1625	87.2855	89.695	90.5525	89.6164	88.1796	88.8637	87.9522
