# Supplementary material for: Adaptability of the Saccharomyces cerevisiae yeasts to wine fermentation conditions relies on their strong ability to consume nitrogen
Source: PLoS One. 2018 Feb 12;13(2):e0192383. doi: 10.1371/journal.pone.0192383 (PMC5809068; doi:10.1371/journal.pone.0192383)
Supplement: S2 Table — (XLSX) [file pone.0192383.s002.xlsx]

## Sheet: Feuil1
Table S2. HPLC results (mg/L) from samples collected during the fermentation processes.
NA-strain																	WA-strain																	SA-strain
Biological replicate 1																	Biological replicate 1																	Biological replicate 1
N-sources	T0	T21	T25	T28	T47	T72	T98	T115	T164	T214	T262	T345	T399	T442	T501		N-sources	T0	T21	T25	T28	T47	T72	T98	T115	T164	T214	T262	T345	T399	T442	T501		N-sources	T0	T21	T25	T28	T47	T72	T98	T115	T164	T214	T262	T345	T399	T442	T501
Asp	48.687	45.6604	40.7188	39.0473	30.5813	26.0655	23.287	24.0551	23.5088	23.606	22.9007	24.4195	24.6687	25.6348	25.8873		Asp	48.687	47.5196	46.5983	47.9682	46.1912	42.0273	36.1659	33.3514	30.0769	27.4537	29.9512	30.0865	30.3526	29.1541	31.424		Asp	48.687	44.6419	42.2483	40.1725	33.0831	28.2074	26.0949	25.6419	24.4816	24.9849	25.1857	25.8449	25.9005	26.4766	28.1164
Glu	125.437	124.201	122.915	121.105	120.414	118.454	115.381	109.46	106.061	113.544	110.095	114.855	112.145	115.276	112.404		Glu	125.437	125.265	121.668	126.33	122.955	122.567	117.85	114.58	111.675	105.583	114.635	114.988	115.274	110.548	117.139		Glu	125.437	124.654	121.017	122.008	115.304	110.419	106.547	107.675	108.84	113.335	114.37	114.924	113.377	113.493	116.525
Ser	82.7212	73.7702	71.7263	68.2422	45.3911	37.9168	29.4647	24.9163	25.1124	25.7661	25.3558	26.2835	25.6245	26.2314	26.0726		Ser	82.7212	74.781	72.7322	77.1803	70.9719	59.685	45.4512	42.4362	35.3269	31.6831	33.968	33.8573	33.2973	32.2577	34.1515		Ser	82.7212	66.6556	60.2331	58.4718	41.1659	30.6481	26.6726	27.3583	26.1878	27.3891	27.6563	27.9396	27.6454	27.8803	29.0542
Gln	292.567	256.817	234.753	207.282	175.006	123.871	103.927	111.518	99.1871	95.1063	86.4137	78.4918	71.2986	68.2281	60.3594		Gln	292.567	260.261	245.181	293.458	241.941	202.469	156.337	140.321	115.445	100.847	102.8	89.0893	82.0054	73.8429	71.6051		Gln	292.567	257.485	231.005	227.762	178.632	145.322	129.804	127.016	111.388	106.214	101.382	89.5202	82.4342	77.4973	72.2881
Arg	392.16	373.69	339.954	327.009	290.709	266.358	249.971	261.903	257.983	263.638	254.927	268.688	267.246	275.294	269.555		Arg	392.16	385.063	373.907	387.5	363.52	335.381	314.259	299.559	288.207	260.185	280.994	278.492	279.693	268.735	288.284		Arg	392.16	362.286	337.272	335.473	300.047	278.248	269.571	265.32	265.171	267.996	269.197	271.979	272.15	276.121	283.452
Thr	78.1499	63.7613	55.1733	49.0123	27.9168	18.966	15.6012	15.7243	14.4992	15.3369	14.4827	15.7067	15.2832	15.9038	16.0651		Thr	78.1499	74.5587	72.5755	74.1784	65.7992	48.436	32.5247	26.2804	20.9373	17.8375	18.7519	19.0287	19.4035	18.7293	19.7963		Thr	78.1499	62.8217	54.5004	49.9749	31.0342	21.8678	18.9819	17.1718	16.9274	16.446	16.6828	16.982	17.0269	17.4657	18.2996
Ala	151.367	150.764	139.452	137.089	127.275	117.515	109.645	115.941	118.033	121.841	119.464	125.895	126.386	131.222	128.781		Ala	151.367	148.158	145.028	151.25	144.706	141.028	135.714	132.471	128.154	121.364	132.377	133.431	134.515	129.863	139.23		Ala	151.367	146.426	140.303	140.955	130.541	120.973	116.033	116.986	118.269	122.447	123.702	126.725	127.198	129.946	134.22
Tyr	18.2855	18.5523	16.4305	16.6369	15.8755	14.6412	14.0014	14.7224	14.4968	14.7612	14.3481	14.8415	14.4717	15.158	15.2564		Tyr	18.2855	17.8869	17.29	18.2062	17.0016	16.163	15.6498	15.3659	14.7679	13.8272	14.8129	14.8171	14.8596	14.2603	15.1517		Tyr	18.2855	17.6782	16.7696	17.1569	16.2354	15.2782	14.6527	14.8042	14.4586	14.6643	14.911	15.0206	14.7287	15.0342	15.8534
NH4+	616.118	616.467	596.199	577.914	559.753	500.301	468.398	482.658	489.655	493.112	483.117	502.656	498.419	513.325	500.521		NH4+	616.118	616.952	601.782	611.544	596.796	581.944	570.454	557.785	543.293	507.857	538.864	539.303	544.541	528.326	563.99		NH4+	616.118	601.788	586.391	580.029	551.68	519.928	503.674	495.677	487.717	497.592	504.257	512.978	508.233	523.725	533.722
Val	48.1512	48.273	45.7	44.4401	40.5485	37.1932	30.3867	31.2704	30.4724	30.5302	30.1014	30.8768	30.928	32.3212	32.1574		Val	48.1512	47.1283	45.9372	48.3254	44.7256	41.5421	36.7883	33.5935	30.3586	27.5589	29.3988	29.3018	29.2541	28.1744	30.4317		Val	48.1512	46.8729	45.6772	44.951	40.5048	35.27	32.3702	31.469	30.5601	31.1696	31.2018	31.642	31.6978	32.228	33.7688
Met	9.99397	10.8693	8.98925	5.40585	2.56725	0	0	0	0	0	0	0	0	0.352159	0.804623		Met	9.99397	13.1332	13.4823	12.6632	11.6728	5.20187	1.40635	1.80105	0.589829	0	0	0	0	0	0.269139		Met	9.99397	11.5591	8.94188	8.6362	3.42047	0.578057	0	0	0	0	0	0	0	0	0.605079
Trp	191.322	168.236	146.947	131.493	88.7515	66.9252	61.8909	80.2106	60.8026	63.3072	61.8708	62.4866	58.8054	57.5333	52.188		Trp	191.322	162.048	149.111	150.474	105.621	85.6196	69.6033	88.0004	62.055	51.2455	51.8141	55.3022	53.7601	50.5731	50.2315		Trp	191.322	153.316	132.742	123.525	81.2822	65.9832	59.5591	78.6441	56.9005	60.3803	62.0004	60.8329	57.9393	54.7647	52.7197
Ile	33.1366	31.6121	29.3164	28.2661	21.8194	15.9892	12.2853	12.8141	10.8223	10.8208	10.3002	11.3852	11.5778	12.6291	13.0717		Ile	33.1366	33.5564	31.548	34.9712	31.1449	26.3832	20.0959	16.3332	12.1662	10.5361	10.9518	10.4656	10.8955	10.2503	11.9746		Ile	33.1366	32.7461	31.3229	29.8259	24.1884	17.3373	14.2337	13.3796	11.6015	11.5648	11.8378	11.8424	11.962	13.0612	13.9521
Leu	49.7855	44.7836	40.4618	38.2526	29.7246	20.0545	14.4224	13.4733	9.31141	8.47035	8.39185	9.38593	11.0174	13.5664	16.2637		Leu	49.7855	46.1969	44.5496	46.7296	39.6867	30.8483	20.6892	17.1184	12.0863	9.61909	10.4168	9.84698	10.601	9.86548	12.4622		Leu	49.7855	43.5352	42.6501	38.8746	29.8863	21.7337	16.5924	15.2858	11.3409	11.2462	10.4792	11.2067	12.4884	14.3666	18.3039
Phe	36.9568	37.6995	35.6225	34.6586	28.1404	25.0418	23.9201	21.896	20.4787	20.6809	19.6489	20.3198	21.8788	24.2069	24.0258		Phe	36.9568	36.2444	36.2094	38.3197	36.2447	32.4892	30.078	27.0606	24.5119	23.2928	24.5197	25.2557	24.7092	24.7137	27.6796		Phe	36.9568	36.426	34.2648	34.8914	30.8645	25.5315	22.2843	21.4035	20.793	20.324	21.4788	21.2669	21.4329	23.613	24.8418
Biological replicate 2																	Biological replicate 2																	Biological replicate 2
N-sources	T0	T21	T25	T28	T47	T72	T98	T115	T164	T214	T262	T345	T399	T442	T501		N-sources	T0	T21	T25	T28	T47	T72	T98	T115	T164	T214	T262	T345	T399	T442	T501		N-sources	T0	T21	T25	T28	T47	T72	T98	T115	T164	T214	T262	T345	T399	T442	T501
Asp	48.687	45.0958	42.3454	41.3834	30.9331	27.8717	26.2472	25.6718	24.961	24.4237	24.8331	25.1761	26.0707	25.9624	27.5885		Asp	48.687	48.5893	47.5688	48.5928	47.7437	40.766	33.4248	30.8647	29.366	28.439	28.8659	29.5489	30.2933	30.1231	30.9035		Asp	48.687	44.6419	42.2483	40.1725	33.0831	28.2074	26.0949	25.6419	24.4816	24.9849	25.1857	25.8449	25.9005	26.4766	28.1164
Glu	125.437	124.021	123.029	124.736	121.288	117.332	116.549	111.856	115.347	113.467	116.41	116.759	117.558	114.163	118.316		Glu	125.437	127.097	125.798	127.854	129.735	124.899	118.35	115.36	115.879	115.318	117.129	118.754	119.365	117.173	118.471		Glu	125.437	122.059	122.27	122.168	120.252	112.672	111.516	112.39	120.063	118.591	118.595	118.496	120.046	120.144	119.572
Ser	82.7212	70.9552	68.4057	65.7037	42.5021	35.07	26.6655	26.6623	26.4773	26.2236	26.9306	26.9107	26.868	26.3439	27.7975		Ser	82.7212	76.3046	74.2894	77.8985	73.0048	56.9889	40.3704	37.3655	32.9434	31.7021	32.1456	33.121	32.4328	31.5494	32.6391		Ser	82.7212	66.1237	62.1868	60.0806	42.9137	31.7978	26.8149	28.205	28.5459	28.6268	28.7654	28.079	28.7434	29.1124	29.2224
Gln	292.567	252.257	227.321	214.018	168.191	129.24	115.38	115.142	103.476	94.757	90.9919	79.572	74.7652	67.7264	63.126		Gln	292.567	283.487	270.557	289.287	271.263	213.116	158.106	143.486	123.932	114.219	107.26	94.8467	88.777	81.9994	74.4968		Gln	292.567	258.923	240.721	238.941	184.54	151.136	133.528	132.614	120.643	111.599	104.288	90.3142	85.8739	80.7647	72.344
Arg	392.16	364.277	353.358	351.278	287.18	283.712	279.887	277.584	276.983	269.153	274.801	274.906	281.707	276.87	286.443		Arg	392.16	389.096	381.575	390.267	377.132	331.386	300.646	282.393	276.647	266.186	262.113	267.901	270.173	265.478	268.808		Arg	392.16	359.928	349.766	342.381	315.155	285.646	282.543	276.762	287.277	278.418	278.355	278.978	288.142	291.113	289.869
Thr	78.1499	61.4178	55.9924	55.5322	26.5961	19.7253	17.5773	16.5397	15.3249	15.1366	15.8567	15.626	15.9829	16.0299	16.8966		Thr	78.1499	75.1421	72.931	74.1766	67.0453	44.0602	26.3325	21.5235	18.6023	17.5403	16.813	17.4322	17.6681	17.4158	17.83		Thr	78.1499	63.3005	56.1902	51.9684	32.6032	23.14	20.1815	18.0869	18.0264	17.4598	16.9494	17.6495	18.115	18.5423	18.734
Ala	151.367	149.276	146.226	145.351	126.187	125.115	121.783	121.77	124.535	122.449	126.408	127.928	131.907	130.435	135.928		Ala	151.367	151.324	148.794	152.691	151.08	145.402	139.806	136.375	137.804	138.215	141.165	144.61	147.47	146.771	148.908		Ala	151.367	144.239	143.564	143.248	135.899	123.564	120.355	120.623	126.914	126.006	126.688	128.067	132.802	135.171	135.435
Tyr	18.2855	17.3609	17.3203	17.5423	15.9322	15.7866	15.329	15.5227	15.3657	14.8559	15.2553	15.2382	15.2053	16.1406	17.3612		Tyr	18.2855	18.0687	17.606	18.3848	17.8249	16.6413	16.047	15.9253	15.8952	15.5069	15.4179	15.8943	16.0371	15.7581	16.296		Tyr	18.2855	17.5534	17.2319	17.5118	16.8932	15.4375	14.7771	15.1197	14.637	15.0931	14.9671	15.0536	15.2258	15.5184	16.0055
NH4+	616.118	619.21	609.831	602.763	570.893	542.772	529.136	520.403	521.477	507.126	518.604	525.143	533.685	524.255	551.071		NH4+	616.118	617.356	605.33	619.619	613.74	586.413	569.775	547.908	540.94	525.67	525.133	531.335	537.711	539.987	534.883		NH4+	616.118	599.935	593.233	589.647	571.242	527.809	521.388	512.512	522.689	509.514	515.423	519.4	525.815	536.738	546.39
Val	48.1512	47.645	46.5845	46.2835	42.598	38.2165	35.0977	32.9577	32.5232	31.0226	31.7944	31.865	32.9963	32.4283	34.3028		Val	48.1512	48.0767	47.3945	48.1968	46.8385	42.0313	36.2332	33.4792	31.9155	31.3843	31.2297	31.5576	32.5326	31.8694	32.6711		Val	48.1512	46.2861	45.8289	45.5895	42.0373	36.197	33.3668	32.1997	32.1447	31.0762	31.1212	31.1369	31.976	32.7478	33.412
Met	9.99397	10.5042	8.92553	11.6761	2.26553	0.394431	0	0	0	0	0	0	0	0.121256	0.71312		Met	9.99397	15.1736	14.6725	13.129	12.2079	5.49445	0.412494	1.20995	0.374415	0	0	0	0	0.254555	0.776981		Met	9.99397	13.3972	9.38405	8.21705	3.42881	0.502615	0	0	0	0	0	0	0	0.183021	0.724844
Trp	191.322	167.188	147.296	142.582	84.7024	72.6926	65.3243	86.0379	64.3147	63.3749	65.2738	62.2865	60.2817	56.4814	54.056		Trp	191.322	170.036	153.796	151.073	117.197	97.9249	78.4814	99.3604	72.6705	66.4865	69.5237	71.1957	69.6976	66.1523	61.9224		Trp	191.322	143.704	140.159	125.23	85.0792	64.4449	59.8633	80.7222	61.9783	62.398	63.7795	62.3127	60.441	58.1618	53.9211
Ile	33.1366	30.4951	31.8058	31.7776	21.9593	17.0061	15.0299	13.9003	12.354	11.3063	11.2028	12.0437	12.5636	12.6497	13.9539		Ile	33.1366	34.8797	33.0677	33.2435	31.7463	25.2538	18.237	15.0055	12.2031	11.5722	11.4497	11.5825	11.902	11.7616	13.1853		Ile	33.1366	31.8661	30.4337	30.1807	24.6192	17.5937	14.8711	13.239	11.9286	11.1239	11.302	11.2716	12.2964	12.7787	13.438
Leu	49.7855	45.3977	42.3766	41.6922	29.8255	21.2748	16.5309	15.225	10.898	9.3868	10.4958	9.9391	12.1781	13.5912	17.5081		Leu	49.7855	48.4204	45.6009	48.3256	42.1877	29.7264	17.8577	14.0209	10.8103	10.8126	9.96198	10.8257	11.9679	12.8201	15.1593		Leu	49.7855	46.2199	42.0872	40.0965	32.266	22.5662	15.4728	13.1322	10.2477	9.14579	8.3751	8.73626	11.0281	12.7507	16.4279
Phe	36.9568	36.0617	35.07	35.4202	28.4821	25.764	24.0346	22.7657	21.8743	21.0419	20.2907	21.6338	22.1528	23.9192	25.4092		Phe	36.9568	37.0077	38.0919	35.3217	35.6354	30.8249	28.8806	28.4638	27.5388	25.3737	27.1025	26.6079	27.1784	27.435	29.669		Phe	36.9568	31.6989	35.908	34.4188	29.9072	25.4929	23.9008	22.6361	20.6721	19.3778	20.5212	20.527	21.2931	24.1118	24.1131
Biological replicate 3																	Biological replicate 3																	Biological replicate 3
N-sources	T0	T21	T25	T28	T47	T72	T98	T115	T164	T214	T262	T345	T399	T442	T501		N-sources	T0	T21	T25	T28	T47	T72	T98	T115	T164	T214	T262	T345	T399	T442	T501		N-sources	T0	T21	T25	T28	T47	T72	T98	T115	T164	T214	T262	T345	T399	T442	T501
Asp	48.687	43.8842	40.0457	40.5214	32.3698	27.6364	26.6991	25.324	25.0398	24.4939	24.5119	25.2864	26.1599	25.825	26.8374		Asp	48.687	48.3212	48.6168	46.7968	47.945	41.7039	34.4689	30.9072	28.9442	27.9829	27.7213	29.033	29.0001	29.3113	30.3402		Asp	48.687	44.1857	42.8703	40.3288	33.342	29.3162	26.823	26.7904	25.6462	24.9384	24.9055	25.9192	26.8197	27.6888	28.1451
Glu	125.437	124.952	122.056	123.297	120.412	114.024	112.175	110.752	113.416	114.337	116.283	116.855	118.02	114.489	115.847		Glu	125.437	125.823	126.191	122.262	128.955	125.07	116.139	111.754	110.635	110.863	113.141	114.551	114.412	113.701	114.182		Glu	125.437	122.815	127.098	123.918	117.742	114.921	113.191	115.926	115.957	119.893	119.105	118.413	120.445	120.735	120.182
Ser	82.7212	69.7284	58.0933	56.2844	43.415	30.4095	26.1276	26.0515	25.4688	25.5036	26.7443	26.9291	26.8073	25.7987	26.8615		Ser	82.7212	77.752	75.2461	75.1421	73.6834	58.8228	41.6398	38.4908	32.9778	31.829	31.8771	32.0292	31.9859	31.3675	32.3968		Ser	82.7212	65.9279	62.1169	58.369	39.6411	30.7468	26.1721	28.1111	26.6178	27.9068	28.0431	27.5269	28.0034	28.4588	28.5016
Gln	292.567	259.701	236.016	215.25	156.049	124.928	113.614	112.002	100.408	92.3248	88.1098	78.7	73.764	66.8951	61.0989		Gln	292.567	288.095	276.365	253.604	275.518	218.754	158.879	143.852	121.787	112.901	107.621	93.3576	86.3751	80.9303	74.1445		Gln	292.567	254.181	237.315	232.036	173.044	147.797	130.898	132.494	113.416	109.723	102.196	88.4234	84.3273	79.2343	70.8059
Arg	392.16	360.014	337.565	341.938	308.104	286.261	282.47	277.903	280.319	275.244	279.148	279.658	286.141	280.503	283.682		Arg	392.16	383.933	386.75	374.816	378.541	339.606	311.472	293.472	284.595	270.606	276.523	277.353	277.193	277.833	280.872		Arg	392.16	358.102	355.139	338.337	305.516	287.775	281.276	280.263	273.618	277.445	275.299	275.15	285.733	288.597	286.7
Thr	78.1499	63.1518	49.0111	49.0151	27.745	19.6021	17.1992	16.0717	15.8306	14.8103	15.2904	15.4972	15.751	15.7303	16.1327		Thr	78.1499	74.3821	73.1562	71.2164	67.919	46.3176	27.2338	21.806	18.3056	16.1872	16.9178	17.3772	17.0081	17.5098	17.6103		Thr	78.1499	62.0505	56.9573	49.4901	29.7733	21.7091	18.8441	17.4712	16.3797	16.6843	16.5877	16.6553	17.058	17.6598	17.9255
Ala	151.367	144.962	141.89	144.231	134.055	124.042	120.801	119.753	123.097	123.52	126.379	127.695	131.876	130.005	132.181		Ala	151.367	149.696	149.323	147.24	150.355	145.191	138.403	134.216	133.017	132.496	136.518	138.923	139.595	140.117	142.228		Ala	151.367	144.661	145.723	142.988	132.757	126.368	123.211	125.149	123.896	128.46	128.491	129.416	134.521	136.963	136.552
Tyr	18.2855	17.6203	17.0653	17.5778	16.7036	15.7912	15.2147	15.3698	15.2549	15.1083	15.3228	15.3786	15.4232	15.0846	15.8067		Tyr	18.2855	17.7652	17.9074	17.6032	17.3738	16.5682	15.3835	15.2564	14.8084	14.0458	14.9407	15.1948	14.9312	14.8069	15.1855		Tyr	18.2855	17.0984	17.125	17.1763	16.5095	15.8325	15.2946	15.729	15.0144	15.4607	14.3067	15.1148	15.3862	15.611	17.1825
NH4+	616.118	602.642	598.273	604.862	575.166	553.096	534.141	520.13	523.327	517.169	524.495	531.462	537.007	528.796	540.409		NH4+	616.118	608.719	610.565	609.45	613.017	587.888	578.832	560.363	547.207	534.768	536.245	541.52	546.101	553.055	563.488		NH4+	616.118	600.782	604.936	588.47	558.789	535.079	523.326	516.85	504.979	510.15	509.188	513	523.51	531.092	521.783
Val	48.1512	46.1933	45.453	46.0832	41.5508	38.3317	34.0209	32.9226	32.5097	31.7415	32.0666	32.1784	32.9198	32.5013	33.6192		Val	48.1512	47.5479	47.6323	46.2433	46.9014	41.5387	34.2333	30.516	27.8201	26.8766	27.3113	27.4032	27.4507	27.5639	28.3705		Val	48.1512	46.2282	46.8869	45.7724	40.9155	36.7304	34.1244	33.4709	32.0688	32.0382	31.7472	31.683	32.7846	33.5476	33.9544
Met	9.99397	10.7298	6.38636	9.20094	2.67872	0.479501	0	0	0	0	0	0	0	0	0.60689		Met	9.99397	15.1222	15.2789	12.3641	12.5995	5.56298	0.763685	1.15214	0.146944	0	0	0	0	0	0.289727		Met	9.99397	11.4186	10.1406	7.68747	3.1177	0.225627	0	0	0	0	0	0	0	0.210758	0.765782
Trp	191.322	165.22	132.692	130.457	91.1006	72.0249	66.7722	85.5404	64.6071	63.2547	64.7729	63.084	61.9602	57.3786	54.1027		Trp	191.322	170.758	155.319	137.781	116.552	102.879	84.4	101.802	73.6631	64.5828	65.5081	68.7313	67.246	64.169	61.1652		Trp	191.322	153.978	139.351	124.008	87.0246	65.3519	61.9142	83.9871	60.8644	62.1338	64.0539	61.7521	61.0065	58.0725	52.611
Ile	33.1366	29.768	27.4052	29.5001	22.1823	17.3179	14.3138	13.6974	11.7653	12.0529	11.9775	12.3058	12.5704	12.7021	13.6466		Ile	33.1366	33.2862	33.9988	31.7037	32.5958	24.3037	16.1799	12.7171	9.79699	8.64329	8.9152	9.01793	8.99678	9.06167	9.97877		Ile	33.1366	31.0256	31.7281	29.4508	23.383	17.8271	15.0403	14.2021	11.8133	11.62	11.6229	11.7438	12.2445	13.0225	14.2591
Leu	49.7855	44.2433	40.8185	39.8729	31.7162	21.9977	16.9084	15.7832	11.7355	10.5317	11.4663	10.6481	12.407	14.162	17.6751		Leu	49.7855	48.5457	47.1361	45.5261	41.1158	27.2127	13.792	9.53999	6.60833	6.38082	5.93387	6.25578	6.66746	7.48766	9.69601		Leu	49.7855	42.9591	43.4804	40.7346	29.5746	21.6756	16.4136	14.9302	10.8178	9.5755	9.79734	9.65984	11.9272	14.0538	16.3452
Phe	36.9568	36.2757	34.5193	35.2531	29.2789	26.1389	24.2476	22.3731	22.134	21.53	20.5107	22.2382	23.1792	24.1194	25.0882		Phe	36.9568	35.1428	35.8136	34.4402	36.908	32.5636	28.4158	27.3831	24.5587	23.0042	24.3465	24.3721	24.407	24.8468	27.5815		Phe	36.9568	36.3513	34.4409	32.5458	30.593	26.5837	23.5028	22.7095	20.5786	20.8819	20.463	21.2282	22.7324	24.7861	26.2811
