# Supplementary material for: Adaptability of the Saccharomyces cerevisiae yeasts to wine fermentation conditions relies on their strong ability to consume nitrogen
Source: PLoS One. 2018 Feb 12;13(2):e0192383. doi: 10.1371/journal.pone.0192383 (PMC5809068; doi:10.1371/journal.pone.0192383)
Supplement: S3 Table — (XLSX) [file pone.0192383.s003.xlsx]

## Sheet: TAT2
Table S3. Nitrogen consumption (mg/L) of the reciprocal hemizygotes for TAT2.
	WE-tat2Δ / SA-TAT2			SA-tat2Δ / WE-TAT2
N-sources	Replicat 1	Replicat 2	Replicat 3	Replicat 1	Replicat 2	Replicat 3
Asp	28.3721	28.3558	28.3811	28.068	28.2161	28.2472
Glu	76.6569	76.6067	76.4835	76.0416	76.244	76.4207
Ser	49.9841	49.9619	49.3586	49.4778	49.9724	50.0274
Gln	166.619	164.258	154.562	165.201	166.514	169.693
Arg	212.019	206.555	185.032	179.828	194.598	211.359
Thr	47.3498	47.3208	46.7372	46.7572	47.3687	47.1661
Ala	87.7484	85.7003	76.9513	85.5819	88.3997	89.5395
Tyr	10.0675	9.80622	9.67145	9.16488	10.1745	10.2615
NH4+	479.274	479.274	479.274	479.274	479.274	479.274
Val	28.3204	28.2704	28.1317	28.1778	28.5193	28.4055
Met	4.93671	4.93671	4.93671	4.93671	4.93671	4.93671
Trp	8.96106	8.8755	8.88373	8.18436	8.93387	8.91669
Ile	19.2098	19.1198	19.2397	18.2703	19.2627	19.3087
Leu	30.036	30.036	30.036	30.036	30.036	30.036
Phe	16.3621	16.7259	16.3644	12.6542	14.3445	14.9956

## Sheet: DIP5
Table S3. Nitrogen consumption (mg/L) of the reciprocal hemizygotes for DIP5.
	WE-dip5Δ / SA-DIP5			SA-dip5Δ / WE-DIP5
N-sources	Replicat 1	Replicat 2	Replicat 3	Replicat 1	Replicat 2	Replicat 3
Asp	27.968	28.2161	28.2472	28.2144	28.162	28.1819
Glu	76.0416	76.244	76.3207	76.3382	76.0923	76.3286
Ser	49.7778	49.9724	50.0274	50.0146	49.8858	50.0047
Gln	162.201	166.514	168.693	166.89	165.279	169.686
Arg	182.828	205.598	211.359	214.919	174.802	215.367
Thr	47.1572	47.3687	47.2661	47.182	47.0679	47.3053
Ala	86.5819	89.3997	90.5395	89.4396	86.3154	89.2935
Tyr	9.86488	10.1745	10.7615	10.2193	9.86459	10.2402
NH4+	479.274	479.274	479.274	479.274	479.274	479.274
Val	28.1778	28.5193	28.5055	28.4069	28.0895	28.4748
Met	4.93671	4.93671	4.93671	4.93671	4.93671	4.93671
Trp	8.28436	8.93387	9.01669	9.02521	8.63843	9.02088
Ile	18.7703	19.2627	19.4087	18.8035	17.3742	19.2788
Leu	30.036	30.036	30.036	30.036	30.036	30.036
Phe	13.8542	14.3445	15.9956	13.4728	7.75632	17.3683

## Sheet: RPI1
Table S3. Nitrogen consumption (mg/L) of the reciprocal hemizygotes for RPI1.
	SA-rpi1Δ / WE-RPI1					WE-rpi1Δ / SA-RPI1
N-sources	Replicat 1	Replicat 2	Replicat 3	Replicat 4	Replicat 5	Replicat 1	Replicat 2	Replicat 3	Replicat 4	Replicat 5
Asp	37.902	38.1708	38.3994	38.1748	37.7978	41.0545	41.323	40.9873	41.3584	41.096
Glu	64.5383	65.991	62.6693	64.0087	62.0689	79.0364	79.0329	79.057	79.8001	80.6956
Ser	66.1124	65.6542	66.1253	66.3399	64.5795	71.6258	72.3353	71.641	72.18	72.3523
Gln	96.5013	97.5877	95.9071	96.5914	95.967	99.0278	98.9581	99.7708	99.9288	100.442
Arg	25.211	14.7197	8.19362	21.1454	32.7903	5.79843	35.0487	31.0925	25.6522	44.621
Thr	68.8999	69.6731	69.028	68.6528	68.2922	71.5684	70.8652	71.4038	71.4989	71.3151
Ala	14.5	14.5	14.5	14.5	14.5	14.5	14.5	14.5	14.5	14.5
Tyr	9.73565	9.91403	9.33548	10.48	10.5166	11.6697	11.8382	11.9472	12.4795	12.9292
NH4+	300.418	278.907	245.691	269.315	289.808	234.992	227.946	250.831	260.993	252.871
Val	34.8736	34.8669	34.0437	35.1665	34.9398	38.6181	38.9083	38.6298	39.2482	39.9893
Met	14.1624	14.1624	14.1624	14.1624	14.1624	14.1624	14.1624	14.1624	14.1624	14.1624
Trp	174.169	162.543	157.658	161.566	163.14	169.669	169.652	168.472	171.481	169.418
Ile	30.4803	30.9998	30.8465	30.9372	30.9143	31.5159	31.3695	31.3548	31.5365	31.4728
Leu	48.8036	48.9005	48.6724	48.5861	48.6808	48.5288	48.4903	48.3157	49.068	49.0897
Phe	31.4731	31.7528	31.2862	31.4159	31.2682	31.8221	31.8872	31.8286	32.514	32.5728
